# Supplementary material for: A single-cell genome reveals diplonemid-like ancestry of kinetoplastid mitochondrial gene structure
Source: PubMed Central journal article supplement (PMC6792441; doi:10.1098/rstb.2019.0100), 2019-10-07

# Metakinetoplastina

# Prokinetoplastina

KINETOPLASTEA

DIPLOMEA

EUGLENIDA

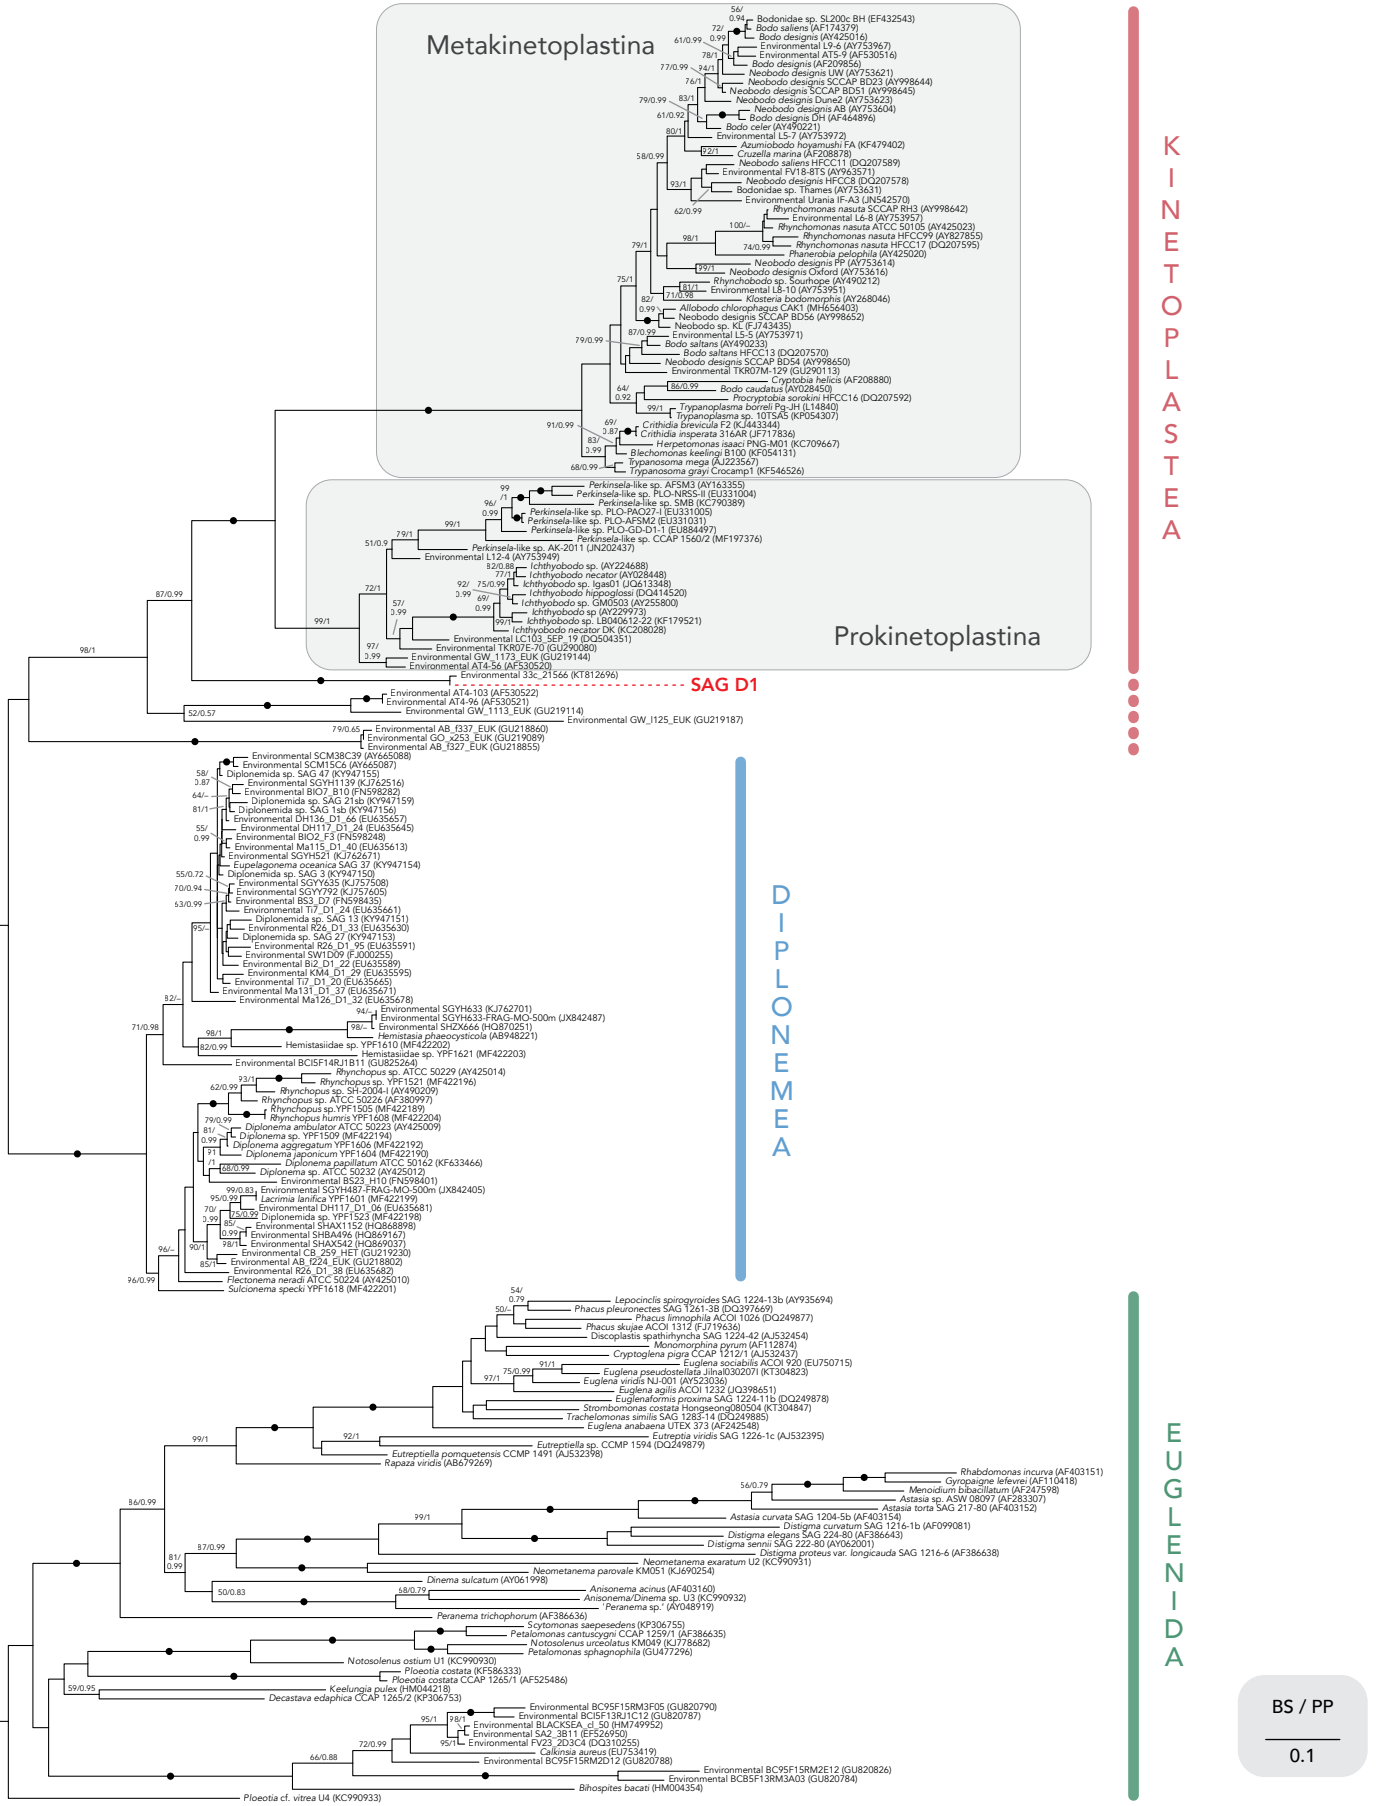

Supplement: rstb20190100supp1.pdf [file rstb20190100supp1.pdf]
