# Supplementary material for: A single-cell genome reveals diplonemid-like ancestry of kinetoplastid mitochondrial gene structure
Source: PubMed Central journal article supplement (PMC6792441; doi:10.1098/rstb.2019.0100), 2019-10-07
Supplement: rstb20190100supp4.pdf [file rstb20190100supp4.pdf]

cox1

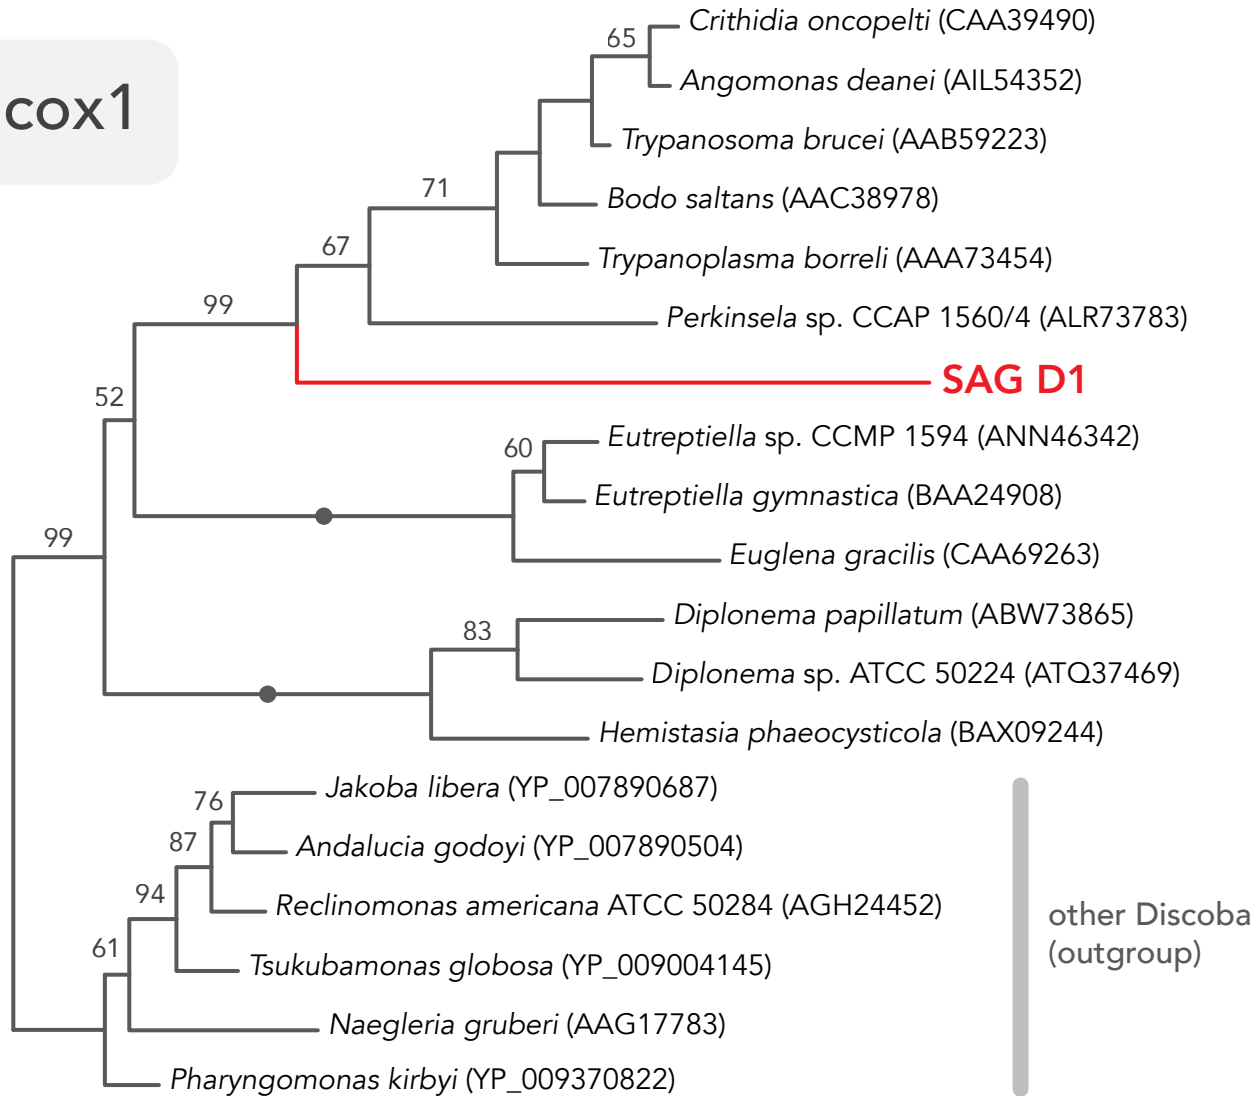

Kinetoplastea

Euglenida

Diplonemea

other Discoba  
(outgroup)

BS

0.5
