# Supplementary material for: A single-cell genome reveals diplonemid-like ancestry of kinetoplastid mitochondrial gene structure
Source: Philos Trans R Soc Lond B Biol Sci. 2019 Oct 7;374(1786):20190100. doi: 10.1098/rstb.2019.0100 (PMC6792441; doi:10.1098/rstb.2019.0100)
Supplement: Table S2 [file rstb20190100supp6.xlsx]

## Sheet: Sheet1
Table S2. Mitochondrial proteins identified in SAG D1
mitoribosomes	Present in other Eukaryotes	Protein	Tb ID	D1 contig(s)
	No	LSU protein	Tb927.11.8040	NODE_3978
	No	SSU protein	Tb927.7.2620	NODE_3704; NODE_541
	No	S15	Tb927.1.1200	NODE_277
	Yes	L38	Tb927.11.14980	NODE_12505
	No	SSU protein	Tb927.5.1510	NODE_4171
	Yes	SSU protein	Tb927.10.11260	NODE_10097
mitochondrial membranes
	No	MOM 35	Tb927.7.4980	NODE_10959
	Yes	cytB5	Tb927.11.13650	NODE_4834
	Yes	tRNA mod	Tb927.6.3510	NODE_219
	Yes	FUN14	Tb927.6.4180	NODE_26263
	No	ATOM11	Tb927.10.11030	NODE_18789; NODE_1712; NODE_49025
	Yes	sphingosine 1-phosphate lyase	Tb927.6.3630	NODE_2446
	No	NADH dehydrogenase 1 beta subunit	Tb927.11.9930	NODE_5014; NODE_7454
	Yes	methyltransferase domain containing protein	Tb927.9.14200	NODE_1194
	Yes	DREV methyltransferase, putative	Tb927.6.2540	NODE_7657
editosome
	Yes	RNA-editing complex protein	Tb927.7.3950	NODE_20708
	Yes	mitochondrial RNA binding protein 16	Tb927.11.7900	NODE_7399
peroxosomal membranes
	Yes	peroxisomal membrane protein 4	Tb927.9.1720	NODE_14907
	Yes	tricarboxylate carrier	Tb927.9.4310	NODE_4245; NODE_47
	Yes	glycosomal transporter (GAT2)	Tb927.11.3130	NODE_1829
